# Supplementary material for: Identification of lesion subtypes in biopsies of ductal carcinoma in situ of the breast using biomarker ratio imaging microscopy
Source: PubMed Central journal article supplement (PMC4887986; doi:10.1038/srep27039), 2016-06-01
Supplement: srep27039-s1.pdf [file srep27039-s1.pdf]

## Supplementary Information

# Identification of lesion subtypes in biopsies of ductal carcinoma in situ of the breast using biomarker ratio imaging microscopy

Andrea J. Clark and Howard R. Petty

### Contents

Supplementary Figure 1

Supplementary Figure 2

Supplementary Figure 3

Supplementary Figure 4

Supplementary Figure 5

Supplementary Table 1

Supplementary Figure 1

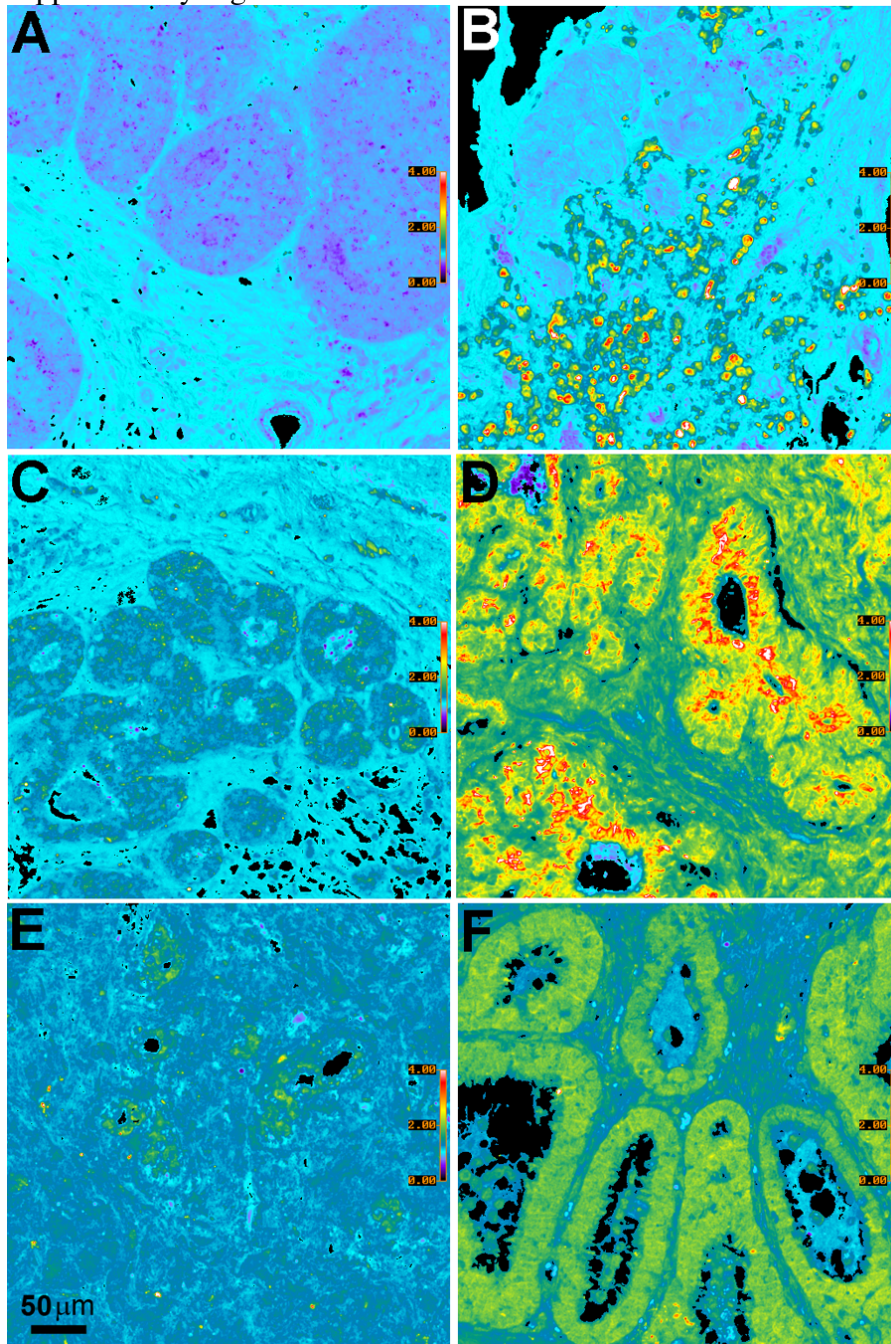

**Supplementary Figure 1.** Examples of pseudocolor ratio images of DCIS tissue samples are shown. This figure illustrates DCIS tissue samples with low (A, C, E) and high (B, D, and F) image ratios for the biomarkers: CD74/CD59 (A, B), CD44/CD24 (C, D), and N-cadherin/E-cadherin (E, F). It should be noted that stromal and epithelial cells are positive in panels B and D, respectively. (Ratio bars are given along the right hand side of each figure.)

Supplementary Figure 2

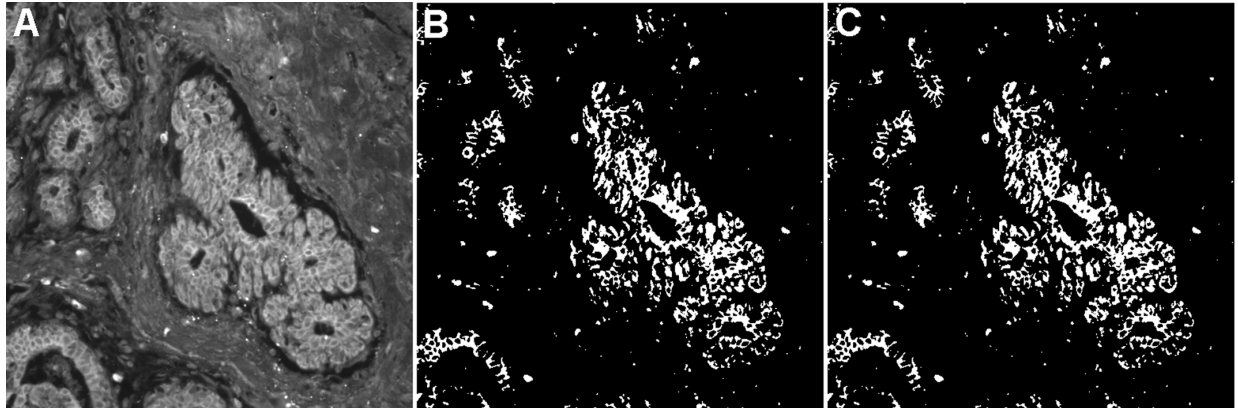

**Supplementary Figure 2.** Examples of image segmentation procedures are shown. A ratiometric N-cadherin/E-cadherin image of a DCIS sample is shown (panel A). In panel B, the ratio image of panel A was segmented using the ISODATA algorithm. Panel C shows the same image segmented using the Otsu algorithm. The threshold was interactively selected by comparison with normal and simple fibroadenoma samples in panel B whereas in threshold was automatically optimized in panel C. Very similar results were obtained.



Supplementary Figure 3

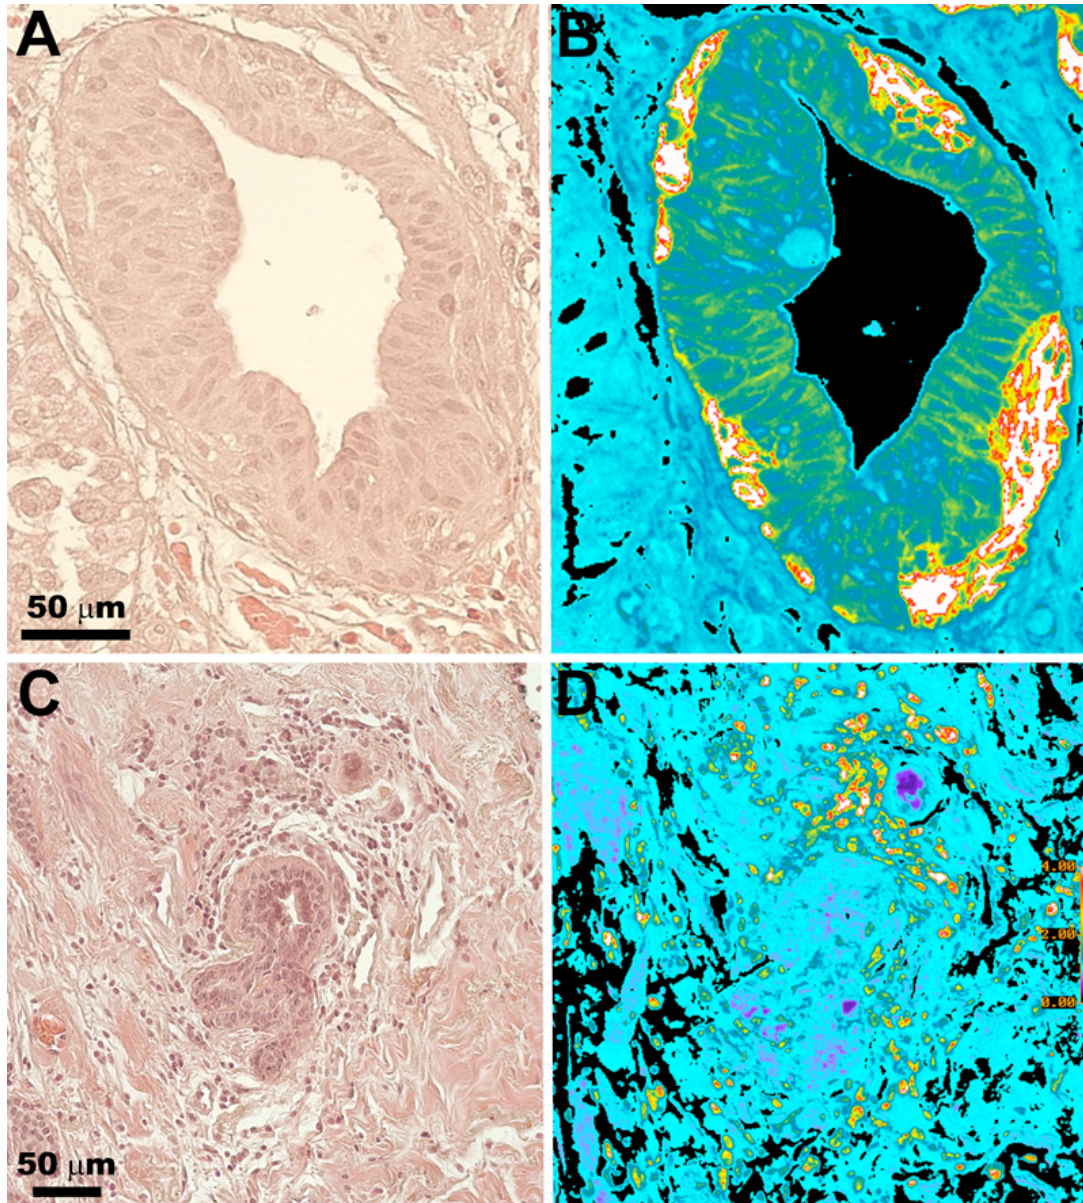

**Supplementary Figure 3.** High BRIM ratios are found for IDCs. H&E (A, C) and BRIM (B, D) micrographs of tissue sections of an IDC. In each pair of micrographs, images of the same tissue region for two nearby tissue sections are shown. An H&E stain of an IDC tissue sample is illustrated in panel A. Panel B shows the same region stained for CD44 and CD24 after BRIM processing. Note that the highest BRIM ratio cells at the perimeter of the duct do not have a columnar morphology. Panels C shows an H&E stain of an IDC sample. Panel D shows a serial section of the same patient sample stained with CD74 and CD59 then processed. CD74<sup>hi</sup>/CD59<sup>lo</sup> cells are apparent. (A, C; bar = 50  $\mu$ m)

Supplementary Figure 4

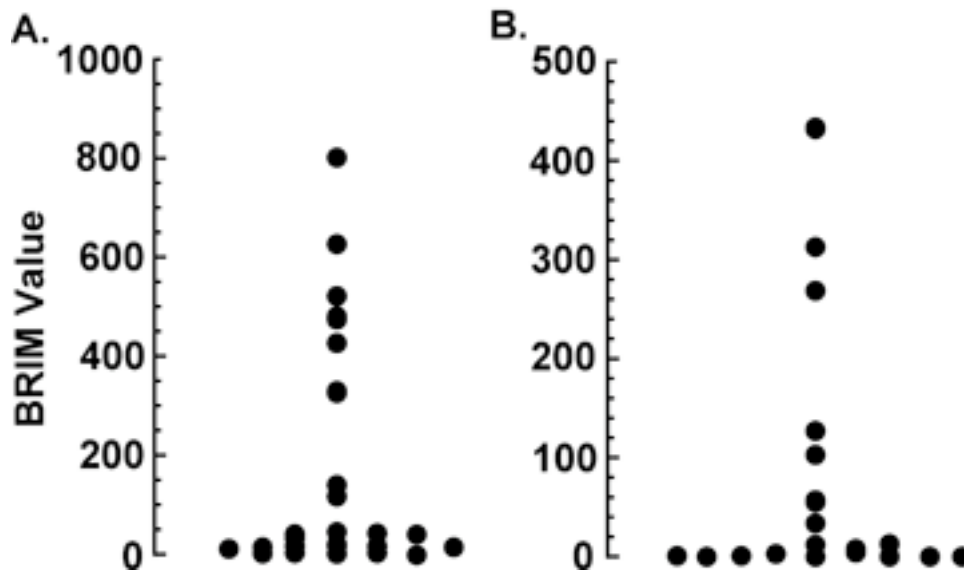

**Supplementary Figure 4.** Stratification of DCIS samples using N-cadherin/E-cadherin (A) and CD44/CD24 (B) ratiometric images are shown. Each dot represents the BRIM value of one patient. A group of patients had very low BRIM values, thus accounting for the extensive number of cases near the baseline. (Some data points may overlap in these scattergrams.)

Supplementary Figure 5

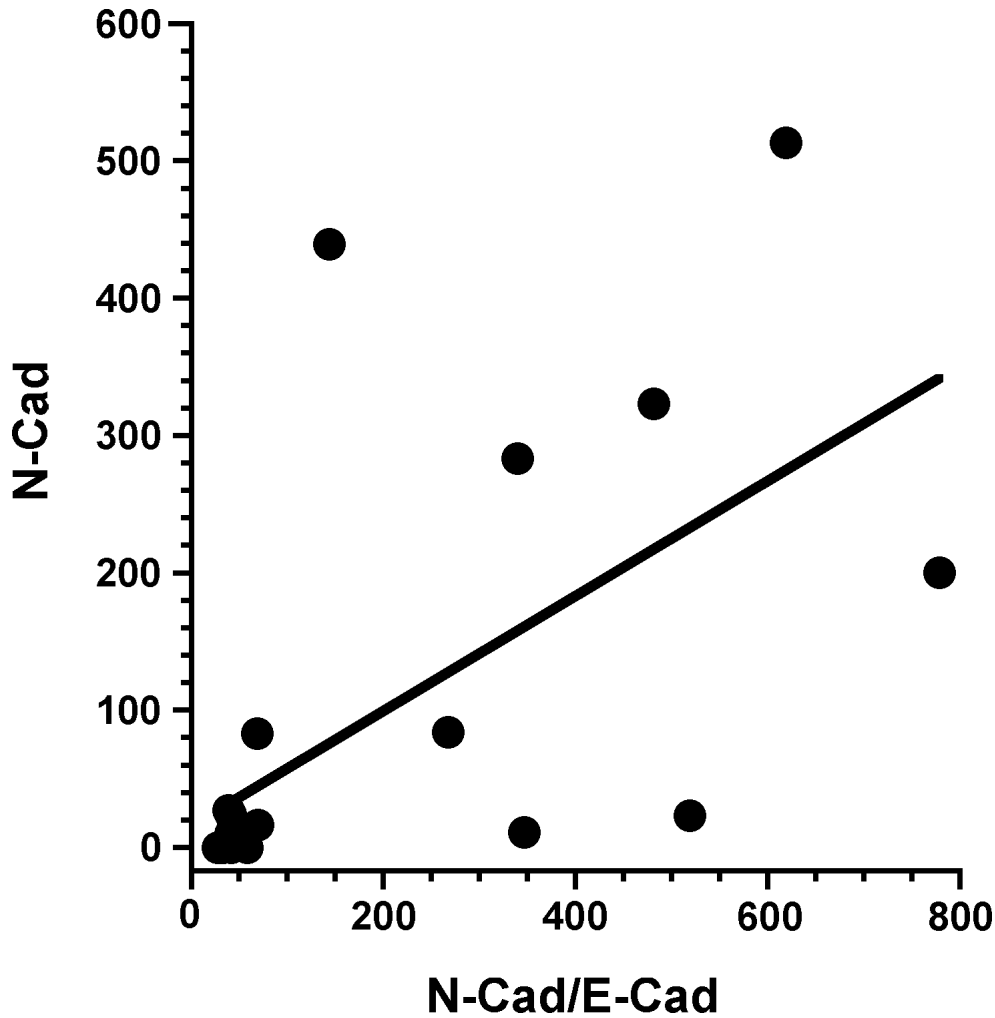

**Supplementary Figure 5.** Comparison of N-cadherin/E-cadherin ratiometric results (abscissa) with single channel assessments of N-cadherin (ordinate) of DCIS samples. The N-cad and N-cad/E-cad results are from matched sets. The correlation coefficient ( $R = 0.61$ ) indicates that these two measures weakly correlate. This weak correlation was largely due to samples poorly staining for N-cadherin. This plot also reveals that some cells with low N-cadherin levels nevertheless expressed high N-cadherin/E-cadherin ratios. (Data from two patients were excluded because their N-cad staining was too high to reliably measure.)

Supplementary Table 1. DCIS Patient Details

| number | age | CD74/CD59 | N-cad/<br>E-cad <sup>1</sup> | CD44/24 | architecture                             | grade                   | Antigen status <sup>2</sup> | BRIM status |
|--------|-----|-----------|------------------------------|---------|------------------------------------------|-------------------------|-----------------------------|-------------|
| 1      | 50  | 263       | 117                          | 486     | comedo,<br>cribriform,<br>micropapillary | high                    | na                          | high        |
| 2      | 53  | 56        | 474                          | 194     | cribriform                               | intermediate            | na                          | high        |
| 3      | 67  | 220       | 627                          | 248     | cribriform,<br>solid                     | intermediate            | na                          | high        |
| 4      | 44  | 3         | 481                          | 211     | solid                                    | Low to<br>intermediate  | na                          | high        |
| 5      | 48  | 1         | 17                           | 8       | solid,<br>cribriform,<br>comedo          | high                    | ER+, PR+                    | high        |
| 6      | 54  | 207       | 802                          | 55      | comedo                                   | high                    | ER-                         | high        |
| 7      | 46  | 120       | 140                          | 432     | solid,<br>micropapillary,<br>mucinous    | low                     | na                          | high        |
| 8      | 82  | 249       | 330                          | 57      | comedo,<br>cribriform,<br>micropapillary | high                    | ER+, PR+                    | high        |
| 9      | 52  | 0         | 31                           | 9       | solid,<br>cribriform                     | high                    | ER+, PR-                    | high        |
| 10     | 64  | 44        | 522                          | 434     | cribriform,<br>papillary                 | intermediate            | ER+, PR+                    | high        |
| 11     | 59  | 134       | 326                          | 313     | comedo                                   | high                    | ER-                         | high        |
| 12     | 56  | 355       | 41                           | 55      | solid, comedo                            | intermediate<br>to high | na                          | high        |
| 13     | 55  | 1         | 11                           | 4       | solid,<br>cribriform                     | low                     | na                          | high        |
| 14     | 79  | 8         | 13                           | 13      | comedo                                   | high                    | na                          | high        |

|    |    |    |    |    |     |                                                       |              |    |      |
|----|----|----|----|----|-----|-------------------------------------------------------|--------------|----|------|
| 15 | 42 | 0  | 0  | 0  | 12  | cribriform, papillary, solid, focal apocrine features | intermediate | na | high |
| 16 | 38 | 15 | 15 | 15 | 34  | Comedo, cribriform apocrine features                  | high         | na | high |
| 17 | 37 | 19 | 42 | 42 | 127 | micropapillary                                        | low          | na | high |
| 18 | 46 | 8  | 20 | 20 | 5   | comedo, cribriform, solid                             | high         | na | high |
| 19 | 52 | 0  | 1  | 1  | 1   | cribriform solid                                      | intermediate | na | low  |
| 20 | 50 | 0  | 1  | 1  | 0   | solid, cribriform                                     | high         | na | low  |
| 21 | 53 | 0  | 0  | 0  | 1   | cribriform, micropapillary                            | intermediate | na | low  |
| 22 | 51 | 0  | 14 | 14 | 0   | cribriform, solid                                     | high         | na | low  |
| 23 | 43 | 2  | 13 | 13 | 0   | solid, cribriform                                     | high         | na | low  |

1) N-cad<sup>hi</sup>/E-cad<sup>lo</sup> cells may be both stromal cells and tumor cells. Thus, some background level of positivity is expected.

Intraductal N-cad<sup>hi</sup>/E-cad<sup>lo</sup> cells and BRIM values >50 indicate an aggressive phenotype. 2) na = not available.
